# Supplementary material
Source: PubMed Central journal article supplement (PMC4178833)
Supplement: JVI.01623-14_zjv999099563so1.pdf [file JVI.01623-14_zjv999099563so1.pdf]

**Supplementary Table 1.** HIV patient therapy regimens for non-viremic and viremic patients analyzed in Figure 4.

| Patient | Sex    | Ethnicity        | Status      | Treatment                                                    | Co-morbidities | HIV Plasma RNA |
|---------|--------|------------------|-------------|--------------------------------------------------------------|----------------|----------------|
| 1       | Male   | Caucasian        | Non-Viremic | Raltegravir, Abacavir/Lamivudine                             | none           | < 0.6          |
| 2       | Female | Caucasian        | Non-Viremic | Ritonavir, Emtricitabine/Tenofovir, Darunavir                | none           | < 0.6          |
| 3       | Female | African American | Non-Viremic | Efavirenz/Emtricitabine/Tenofovir                            | Hepatitis C    | < 0.7          |
| 4       | Male   | African American | Non-Viremic | Efavirenz/Emtricitabine/Tenofovir                            | none           | < 0.6          |
| 5       | Male   | African American | Non-Viremic | Atazanavir, Ritonavir, Emtricitabine/Tenofovir               | none           | 3.8            |
| 6       | Female | African American | Non-Viremic | Atazanavir, Ritonavir, Emtricitabine/Tenofovir               | none           | 0.6            |
| 7       | Male   | African American | Non-Viremic | Efavirenz, Emtricitabine/Tenofovir                           | Hepatitis C    | 2.5            |
| 8       | Male   | African American | Non-Viremic | Atazanavir, Ritonavir, Emtricitabine/Tenofovir               | Hepatitis C    | 1.9            |
| 9       | Male   | African American | Non-Viremic | Emtricitabine, Tenofovir, Raltegravir                        | none           | 25.7           |
| 10      | Male   | Caucasian        | Non-Viremic | Zidovudine, Emtricitabine/Tenofovir, Etravirine, Raltegravir | none           | 4.3            |
| 11      | Male   | African American | Viremic     | Ritonavir, Emtricitabine/Tenofovir, Darunavir                | none           | 866.7          |
| 12      | Male   | African American | Viremic     | Treatment naïve                                              | none           | 17,341         |
| 13      | Male   | Latino           | Viremic     | Elvitegravir/Cobicistat/Emtricitabine/Tenofovir              | none           | 2,774          |
| 14      | Male   | African American | Viremic     | Treatment naïve                                              | none           | 206,800        |
| 15      | Male   | African American | Viremic     | Not on medication                                            | none           | 564            |
